# Supplementary material for: Sleep Apnea Detection Using Wearable ECG and Deep Learning: Validation with Polysomnography
Source: Research Square preprint supplement (doi:10.21203/rs.3.rs-7537553/v1), 2025-09-17
Supplement: Supplementary file 1 [file cfedd6b453e4e3a9bcb3bd0d.docx]

**Sleep Apnea Detection Using Wearable ECG and Deep Learning: Validation with Polysomnography**

Sue Hyun Lee1*, Minwoo Kim2*, Sung Pil Cho2, Yeewoong Kim2, Min Kyung Chu3, Won-Joo Kim4, Kyoung Heo3, Kyung Min Kim3

1 Department of Neurology, National Health Insurance Service Ilsan Hospital, Goyang-si, Korea

2 MEZOO Co., Ltd., Wonju-si, Korea

3 Department of Neurology, Severance Hospital, Yonsei University College of Medicine, Seoul, Korea

4 Department of Neurology, Gangnam Severance Hospital, Yonsei University College of Medicine, Seoul, Korea

* These authors contributed equally to the work

Corresponding author: Kyung Min Kim, MD, PhD

Department of Neurology, Severance Hospital, Yonsei University College of Medicine, 50-1 Yonsei-ro, Seodaemun-gu, Seoul 03722, Republic of Korea

Telephone: +82-2-2228-1600, Fax: +82-2-393-0707, Email: penlighting11@yuhs.ac

**Figure S1.** Graphs of loss and accuracy change for train and validation per epoch.
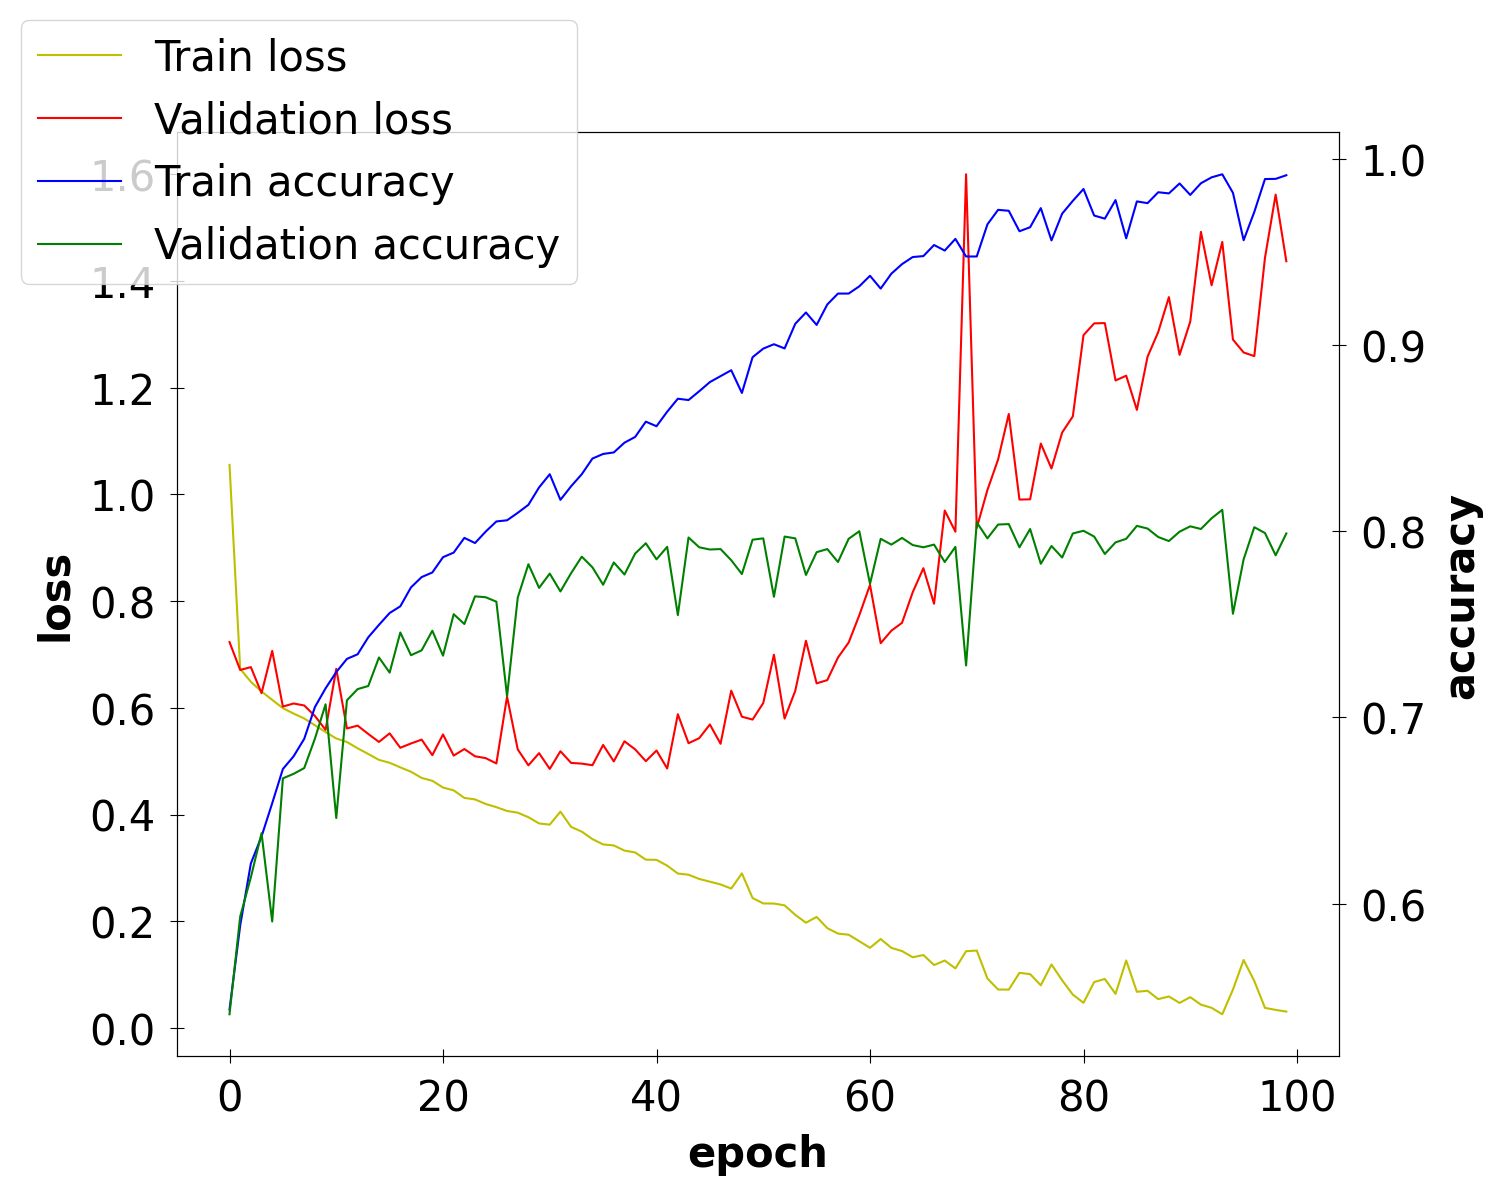


**Table S1.** Performance comparison of several optimizers and learning rate ratio in predicting normal and apnea/hypopnea

| **Optimizer** | **Epoch** | **Training loss** | **Training Accuracy** | **Validation Accuracy** |
| --- | --- | --- | --- | --- |
| SGD | 63 | 0.5291 | 0.7330 | 0.7092 |
| RMSProp | 30 | 0.4556 | 0.7863 | 0.7602 |
| Adagrad | 33 | 0.5994 | 0.6714 | 0.6534 |
| Adadelta | 42 | 0.6439 | 0.6293 | 0.6345 |
| Adam | 41 | 0.3598 | 0.8392 | 0.7837 |
| Adamax | 68 | 0.3453 | 0.8438 | 0.8026 |
| Nadam | 65 | 0.1326 | 0.9447 | 0.8072 |
| **Learning rate** | **Epoch** | **Training loss** | **Training Accuracy** | **Validation Accuracy** |
| 0.001 | 43 | 0.2746 | 0.8802 | 0.8017 |
| 0.005 | 1 | 0.6920 | 0.5242 | 0.5260 |
| 0.0001 | 54 | 0.4549 | 0.7893 | 0.7737 |
| 0.0005 | 34 | 0.3840 | 0.8257 | 0.7892 |
| 0.00001 | 43 | 0.5821 | 0.6900 | 0.6838 |
| 0.00005 | 33 | 0.5426 | 0.7218 | 0.7317 |

SGD: Stochastic Gradient Descent; RMSProp: Root Mean Square Propagation; Adagrad: Adaptive Gradient; Adadelta: Adaptive Delta; Adam: Adaptive Moment Estimation; Adamax: Adam + Max; Nadam: Nesterov-accelerated Adaptive Moment Estimation

**Table S2.** Performance comparison of EKG segment length

| **Segment length** | **Accuracy** | **Precision** | **Recall** | **F1-Score** |
| --- | --- | --- | --- | --- |
| 5 minutes | 0.7650 | 0.8279 | 0.7622 | 0.7937 |
| 3 minutes | 0.8115 | 0.8193 | 0.8249 | 0.8221 |
| 1 minute | 0.7755 | 0.7179 | 0.7017 | 0.7097 |
| 30 seconds | 0.7752 | 0.6146 | 0.5491 | 0.5800 |
